# Supplementary material
Source: publisher figshare collection journal article supplement (https://sage.figshare.com/ndownloader/files/18724949)
Supplement: Supplementary file 1 [file 18724949]

## Sheet: Sheet1
S1. Administrative Unit vs Research Expenditures
IBC										IACUC
	0-10M		11-100M		101-500M		501->1B				0-10M		11-100M		101-500M		501->1B
Vice President/Chancellor for Research	3	0.142857	15	0.517241	16	0.516129	11	0.578947		Vice President/Chancellor for Research	2	0.0952381	18	0.62069	16	0.516129	13	0.684211
EHS	5	0.238095	6	0.206897	7	0.225806	3	0.157895		EHS		0		0		0		0
Research Integrity and/or Compliance Office	4	0.190476	4	0.137931	5	0.16129	3	0.157895		Research Integrity and/or Compliance Office	6	0.285714	5	0.172414	9	0.290323	4	0.210526
Other	3	0.142857	1	0.0344828	2	0.0645161	2	0.105263		Other	3	0.142857		0	3	0.0967742	2	0.105263
President/CEO	4	0.190476	1	0.0344828	1	0.0322581		0		President/CEO	3	0.142857		0	2	0.0645161		0
Sponsored Programs	2	0.0952381	1	0.0344828		0		0		Sponsored Programs	2	0.0952381	2	0.0689655	1	0.0322581		0
None		0	1	0.0344828		0		0		None	5	0.238095	4	0.137931		0		0
External		0		0		0		0		External		0		0		0		0
total	21		29		31		19			total	21		29		31		19
BSO										IRB
	0-10M		11-100M		101-500M		501->1B				0-10M		11-100M		101-500M		501->1B
Vice President/Chancellor for Research	3	0.142857	6	0.206897	5	0.16129	2	0.105263		Vice President/Chancellor for Research	3	0.142857	18	0.62069	17	0.548387	13	0.684211
EHS	4	0.190476	15	0.517241	22	0.709677	17	0.894737		EHS		0		0		0		0
Research Integrity and/or Compliance Office	4	0.190476		0	2	0.0645161		0		Research Integrity and/or Compliance Office	6	0.285714	5	0.172414	10	0.322581	4	0.210526
Other	4	0.190476	4	0.137931	2	0.0645161		0		Other	2	0.0952381	2	0.0689655	2	0.0645161	2	0.105263
President/CEO	3	0.142857	1	0.0344828		0		0		President/CEO	1	0.047619	1	0.0344828	1	0.0322581		0
Sponsored Programs		0		0		0		0		Sponsored Programs	2	0.0952381	2	0.0689655	1	0.0322581		0
None	3	0.142857	3	0.103448		0		0		None	6	0.285714	1	0.0344828		0		0
External		0		0		0		0		External	1	0.047619		0		0		0
total	21		29		31		19			total	21		29		31		19
